# Supplementary material for: Nuclear envelope tethering inhibits the formation of ALT-associated PML bodies in ALT cells
Source: PubMed Central journal article supplement (PMC8064153; doi:10.18632/aging.202810), 2021-04-04
Supplement: aging-13-202810-s002.pdf [file aging-13-202810-s002.pdf]

## SUPPLEMENTARY TABLES

**Supplementary Table 1. Oligo sequences for shRNA-mediated gene knockdown.**

| Clone ID       | Gene symbol           | Target sequence       | Region |
|----------------|-----------------------|-----------------------|--------|
| TRCN0000279614 | <i>SUN1</i>           | GAACTAGAACAGACCAAGCAA | CDS    |
| TRCN0000133655 | <i>SUN1</i>           | GCTGTTCTGAAACTTACGAAA | CDS    |
| TRCN0000049297 | <i>TOP3A</i>          | GCTTCTCGAAAGTTGAGAATA | CDS    |
| TRCN0000295900 | <i>TERF2IP (RAP1)</i> | GAGAGTTCTTGCATTGGAAC  | 3'UTR  |

**Supplementary Table 2. Primers used in this study.**

| Primer             | Sequence                                                               |
|--------------------|------------------------------------------------------------------------|
|                    | pLAS5w-RAP1                                                            |
| RAP1-NheI-For      | CCACGTGGCGATCGCTAGCGCCACCATGGCGGAGGCGATGGATTTGGGCAAAGACCCCAA           |
| RAP1-NsiI-Rev      | CTGTACATGCATTTATTTCTTTCTAAATTCAATCCTCCGAGCTACATTCTGAGCACC              |
|                    | pLAS5w-SUN1                                                            |
| NheI-SUN1-For      | GCTAGCATGGATTTTTCTCGGCTTCA                                             |
| SUN1-EcoRI-Rev     | GAATTCTCACTTGACAGGTTGCGCCAT                                            |
|                    | pLAS5w-RAP1-SUN1                                                       |
| HpaI-RAP1-For      | GTTAACATGGCGGAGGCGATGGATTT                                             |
| RAP1-G8-NheI-Rev   | GCTAGCACCACCACCACCACCACCACCTTTCTTTTCGAAATTCAATCC                       |
| NheI-SUN1-For      | GCTAGCATGGATTTTTCTCGGCTTCA                                             |
| SUN1-EcoRI-Rev     | GAATTCTCACTTGACAGGTTGCGCCAT                                            |
|                    | pLAS5w-RAP1 $\Delta$ C-SUN1                                            |
| HpaI-RAP1-For      | GTTAACATGGCGGAGGCGATGGATTT                                             |
| RCTdel-G8-NheI-Rev | GCTAGCACCACCACCACCACCACCACCACCACCACC<br>TGAGTCTTCCTCAGGTGTGGGTGGATCATC |
|                    | pcDNA3HA-RAP1                                                          |
| RAP1-BamHI-1F      | GGATCCAATGGCGGAGGCGATGGATTTG                                           |
| RAP1-XhoI-R        | CTCGAGTTATTTCTTTTCGAAATTC                                              |
|                    | pcDNA3HA-RAP1 $\Delta$ N                                               |
| hRAP1-BamHI-129F   | GGATCCACGGCAGCCGGGCGGATC                                               |
| RAP1-XhoI-R        | CTCGAGTTATTTCTTTTCGAAATTC                                              |
|                    | pcDNA3HA-RAP1 $\Delta$ Myb                                             |
| Mybdel-F           | AGCCGCAGCGGCACGCCGGGAGCATAAGTACCTGCTGGGGGACG                           |
| Mybdel-R           | CCCAGCAGGTACTTATGCTCCCCGGCGTGCCGCTGCGGCTCCGGC                          |
|                    | pcDNA3HA-RAP1 $\Delta$ Coil and pLAS5w-RAP1 $\Delta$ Coil              |
| Coildel-F1         | GACCGCTACCTCAAGCACCTGCGGGGCCAGGACTCAGAAACACAGCCTGATGAGGAGGAA           |
| Coildel-R1         | TTCTCCTCATCAGGCTGTGTTTCTGAGTCTGGCCCCGAGGTGCTTGAGGTAGCGGTC              |
|                    | pcDNA3HA-RAP1 $\Delta$ C                                               |
| RAP1-BamHI-1F      | GGATCCAATGGCGGAGGCGATGGATTTG                                           |
| hRAP1-XhoI-289R    | CTCGAGTTATTCCTCAGGTGTGGGTGG                                            |
