# Supplementary material for: Nuclear envelope tethering inhibits the formation of ALT-associated PML bodies in ALT cells
Source: Aging (Albany NY). 2021 Apr 4;13(7):10490–516. doi: 10.18632/aging.202810 (PMC8064153; doi:10.18632/aging.202810)
Supplement: Supplementary Figures [file aging-13-202810-s001.pdf]

## SUPPLEMENTARY FIGURES

**A**

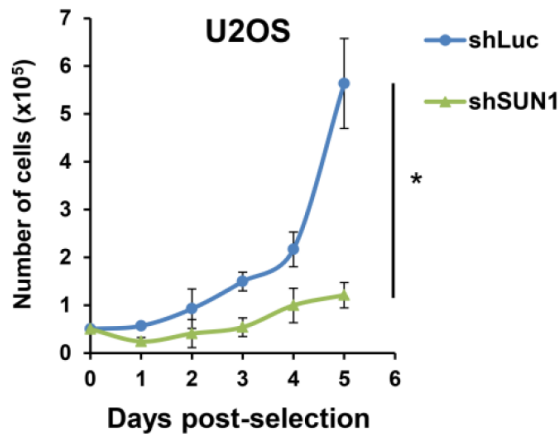

**B**

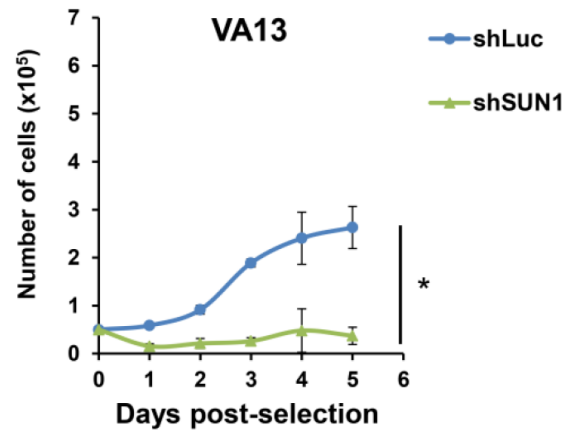

**C**

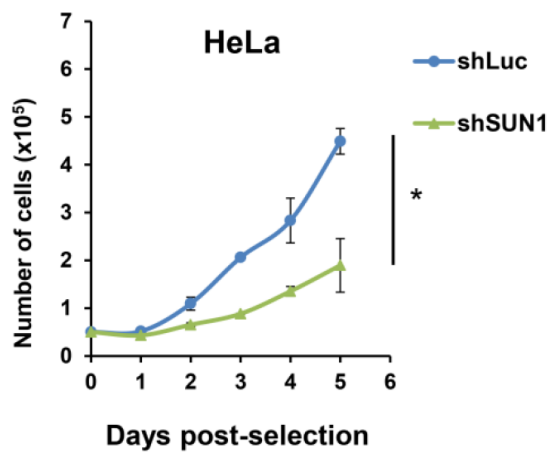

**D**

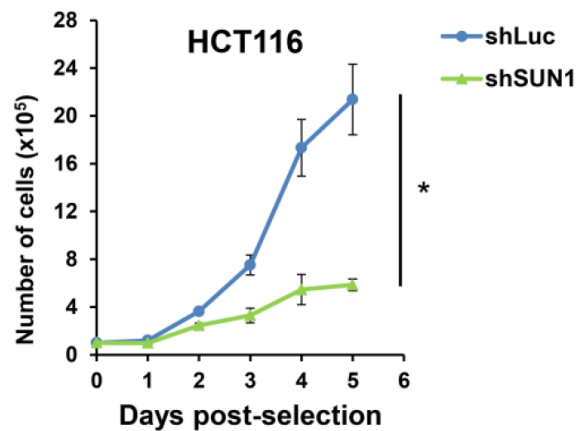

**Supplementary Figure 1. Depletion of SUN1 reduces cell growth.** The growth curves of the control (shLuc) and knockdown of SUN1 (shSUN1) in two telomerase-negative ALT cell lines, (A) U2OS cells and (B) VA13 cells, and two telomerase-positive cell lines, (C) HeLa cells and (D) HCT116 cells, are shown. After lentivirus infection, the cells were selected with puromycin. Cell numbers were counted during drug selection. Error bars denote SD; n=3 (independent experiments); \* $P < 0.05$  (two-tailed Student's t-test).

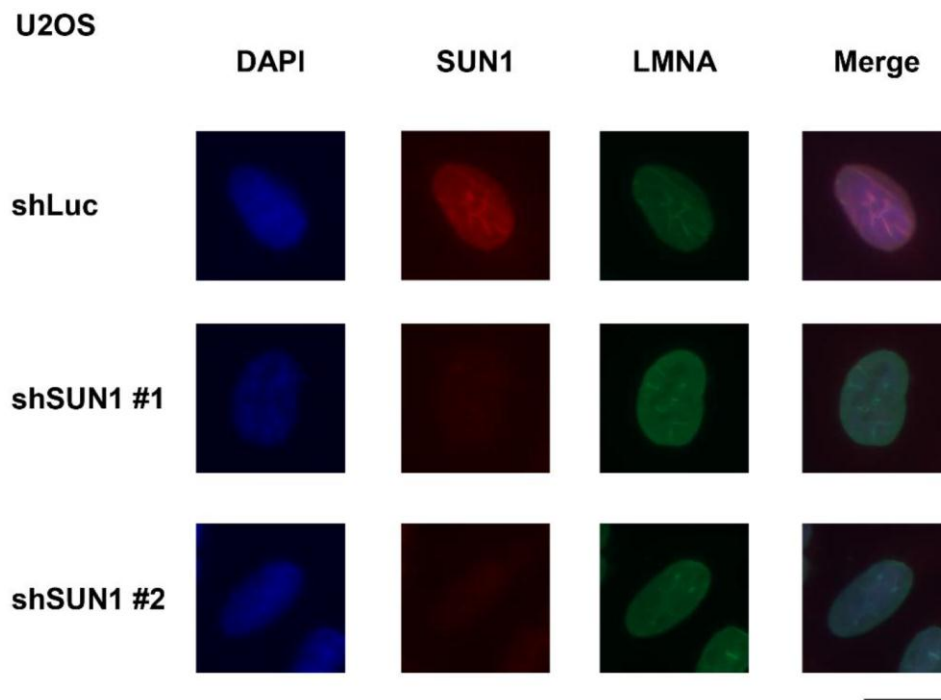

**Supplementary Figure 2. Cells with SUN1 depleted maintain the intact structure of the nuclear lamina.** U2OS cells were infected with control (shLuc) or shSUN1 lentiviruses and selected with puromycin for 3 days. The cells were used to perform immunofluorescence assays with anti-SUN1 (EPR6554, ab124770, Abcam) and anti-Lamin A/C (N-18, sc-6215) antibodies. DNA was stained with DAPI. Scale bar, 20  $\mu$ m.

**A**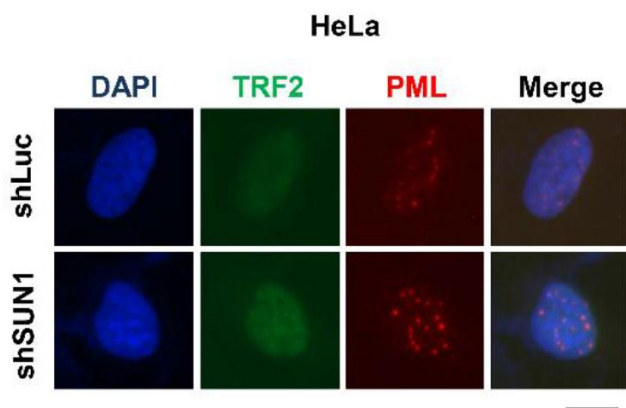**B**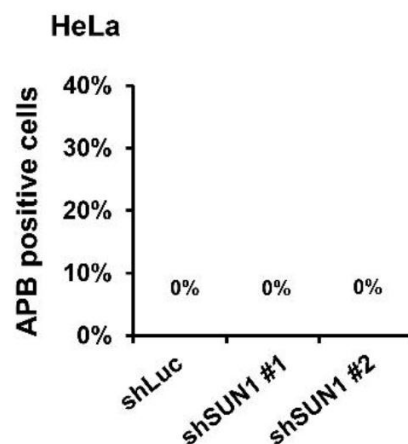**C**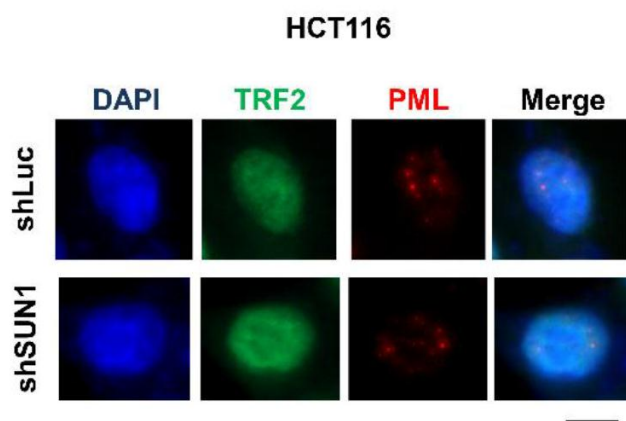**D**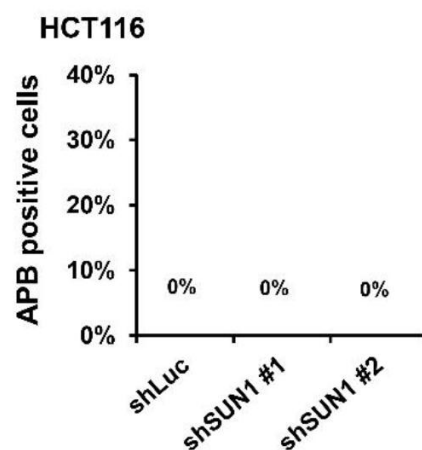

**Supplementary Figure 3. Depletion of SUN1 does not induce APB formation in telomerase-positive cells.** Telomerase-positive HeLa and HCT116 cells were infected with control (shLuc) or SUN1 knockdown (shSUN1) lentiviruses and selected with puromycin for 3 days. Representative images show that no APB foci were formed in the SUN1-depleted (A) HeLa cells or (C) HCT116 cells. Quantifications of APBs (%) in the (B) HeLa cells and (D) HCT116 cells were shown, respectively. Approximately 200-300 cells were analyzed for each independent experiment. Error bars denote SD; n=3 (independent experiments). Scale bar, 20  $\mu$ m.

**A**

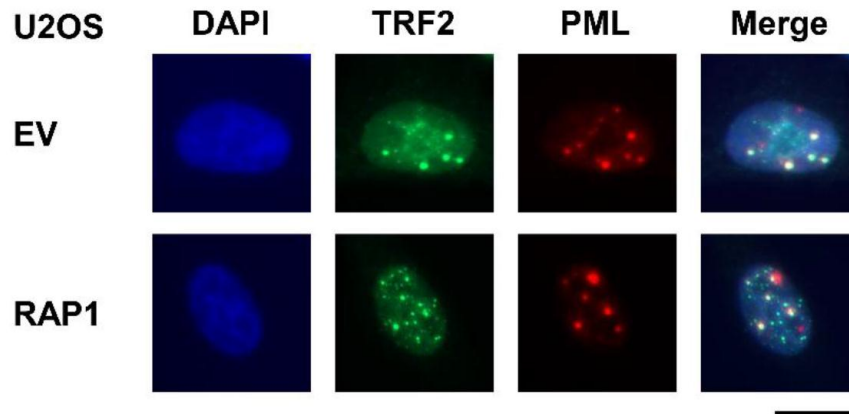

**B**

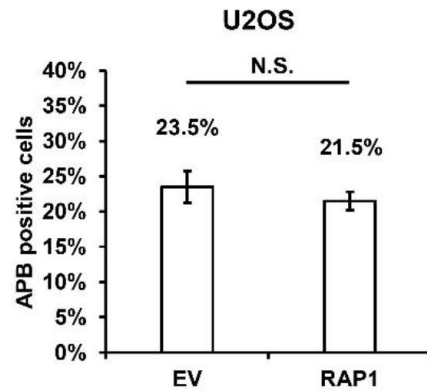

**C**

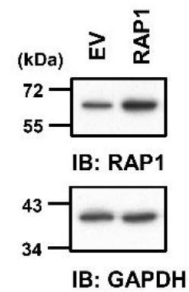

**Supplementary Figure 4. Overexpression of the RAP1 protein alone does not significantly reduce the APB formation.** (A) Representative images show the APBs formed in empty vector control (EV)-expressing or RAP1-expressing U2OS cells. Immunostaining was performed as described in Figure 1. Scale bar, 20  $\mu$ m. (B) Quantification of APBs (%) in the U2OS cells shown in (A). Approximately 200-300 cells were analyzed for each independent experiment. Error bars denote SD; n=3 (independent experiments); N.S., no significance (two-tailed Student's t-test). (C) Cell lysates were immunoblotted with anti-RAP1 and anti-GAPDH antibodies. GAPDH was used as the loading control.

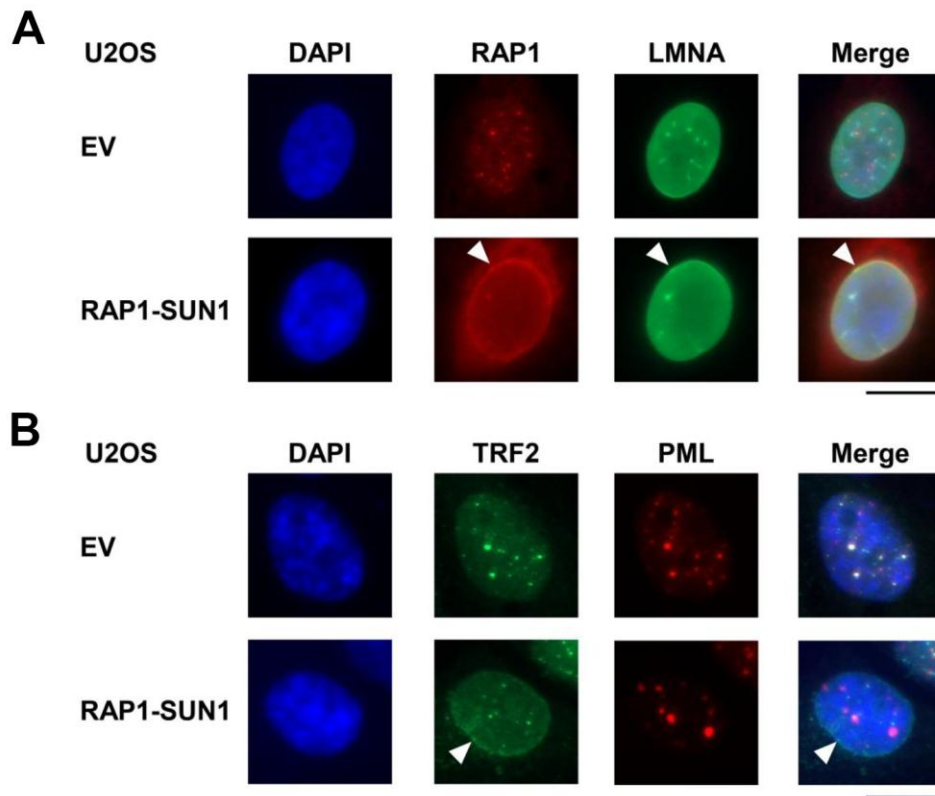

**Supplementary Figure 5. RAP1-SUN1 fusion proteins are located around the periphery of the nucleus and competent to recruit TRF2.** U2OS cells were infected with lentivirus expressing the empty vector control (EV) or RAP1-SUN1 fusion protein and then selected in medium containing G418- for 5 days. **(A)** Representative images show the colocalization of RAP1-SUN1 and Lamin A/C in U2OS cells. The arrowhead indicates the colocalization site. **(B)** Representative images show that TRF2 appears around the nuclear periphery in the RAP1-SUN1-overexpressing U2OS cells (arrowhead). Scale bar, 20  $\mu$ m.

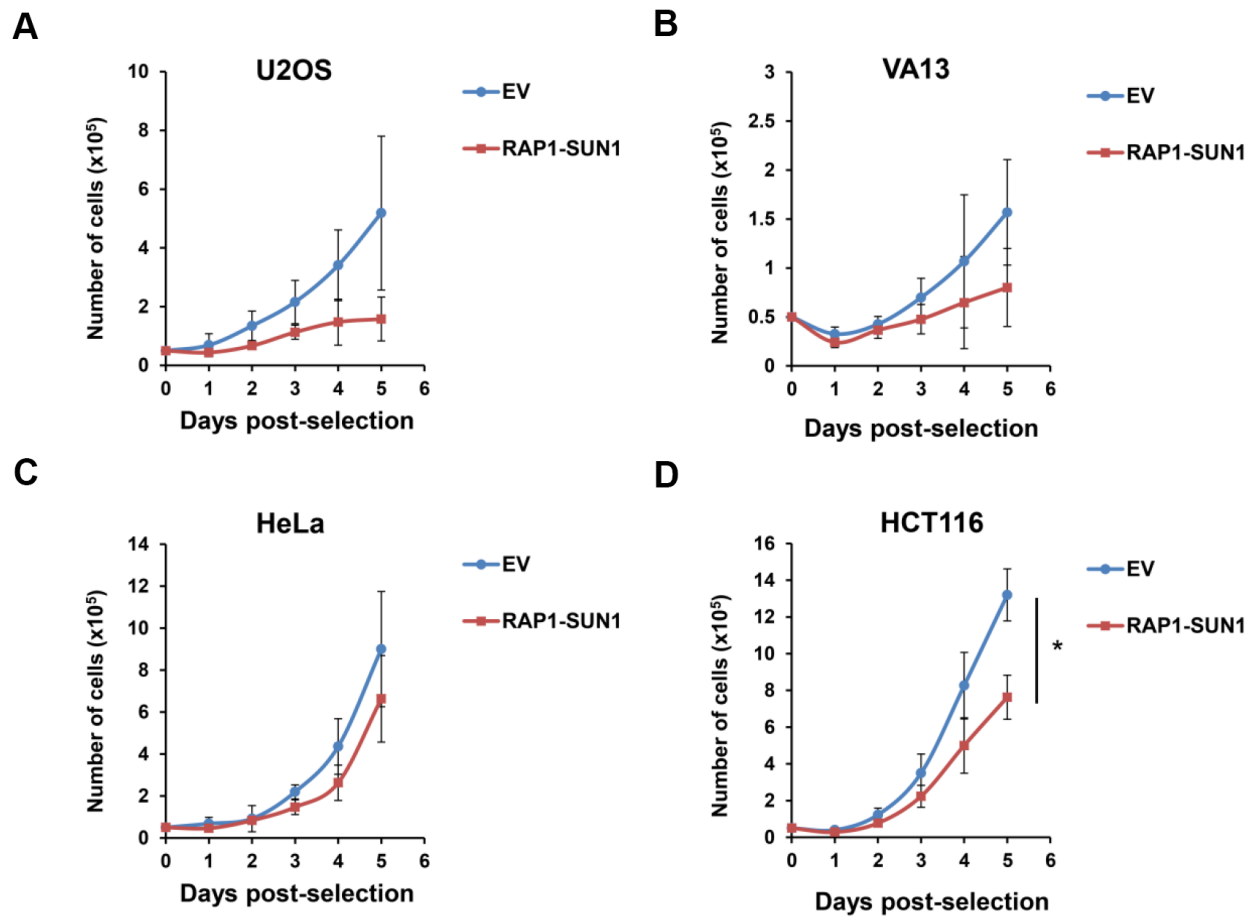

**Supplementary Figure 6. Expression of the RAP1-SUN1 fusion protein reduces cell growth.** The growth curves of cells expressing the empty vector (EV) or RAP1-SUN1 fusion protein (RAP1-SUN1) in two telomerase-negative ALT cell lines, (A) U2OS cells and (B) VA13 cells, and two telomerase-positive cell lines, (C) HeLa cells and (D) HCT116 cells, are shown. After lentivirus infection, cells were the selected for G418. Cell numbers were counted during drug selection. Error bars denote SD; n=3 (independent experiments); \*  $P < 0.05$  (two-tailed Student's t-test).

**A**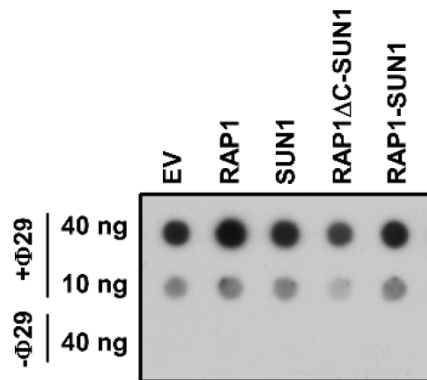**B**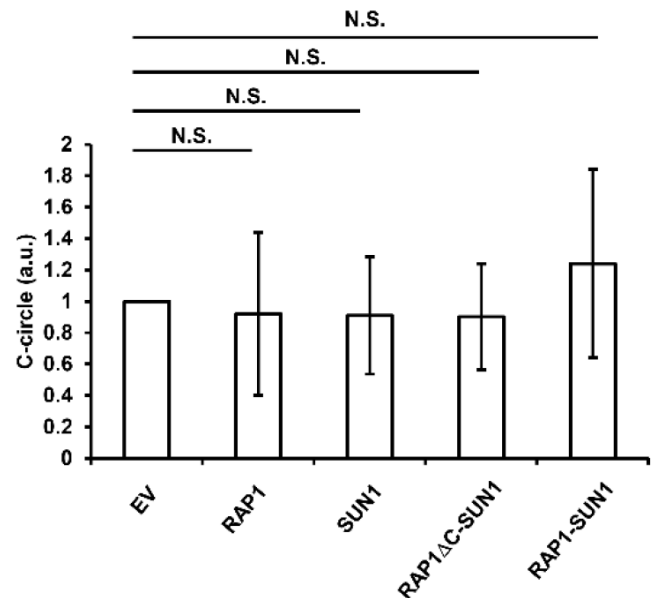

**Supplementary Figure 7. Overexpression of the RAP1-SUN1 fusion protein did not significantly change the C-circle level in U2OS cells.** (A) The C-circle level in U2OS cells expressing the empty vector (EV), RAP1, SUN1, RAP1ΔC-SUN1, or RAP1-SUN1 fusion protein. (B) Quantification of the level of C-circles shown in (A). The C-circle signals were quantified with ImageJ software. The level of C-circles is represented in an arbitrary unit (a.u.). Error bars denote SD; n=3 (independent experiments); N.S., no significance (two-tailed Student's t-test).

**A**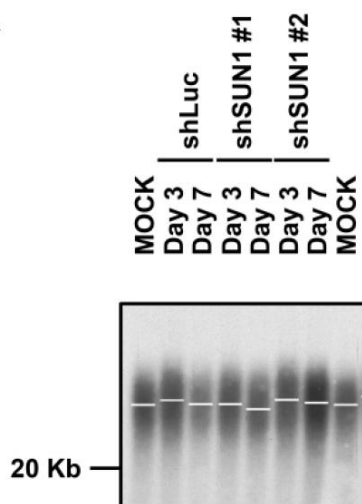**B**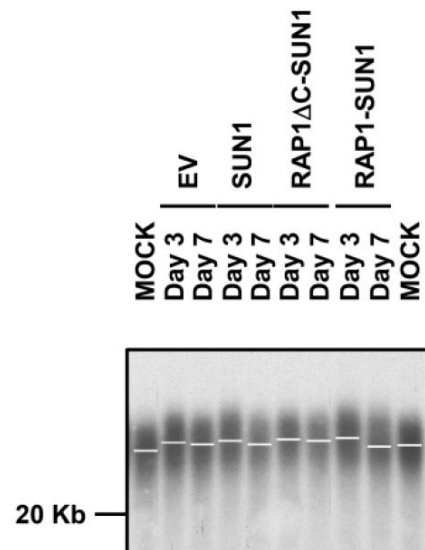

**Supplementary Figure 8. Knockdown or overexpression of SUN1 does not disturb the homeostasis of telomere length in cells in short-term culture.** (A) U2OS cells were infected with control (shLuc) or SUN1-knockdown (shSUN1) lentiviruses. The cells were selected with 1 μg/ml puromycin for 3 days and 7 days, respectively. Telomere length was measured by TRF assay. The peak intensity of telomere length is indicated by a white line. (B) U2OS cells were infected with lentiviruses overexpressing the control (EV), SUN1, RAP1ΔC-SUN1 fusion, or RAP1-SUN1 fusion protein. The cells were selected, and telomere length was measured as described in (A).

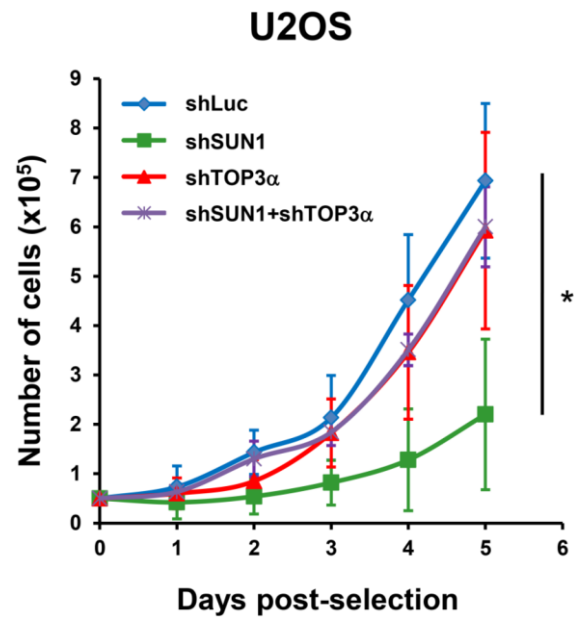

**Supplementary Figure 9. Growth curves of the shLuc, shSUN1, shTOP3 $\alpha$ , and shSUN1+shTOP3 $\alpha$  ALT cells.** The growth curves of U2OS cells within 5 days postselection are shown. Error bars denote SD; n=3 (independent experiments); \*  $P<0.05$  (two-tailed Student's t-test).
